# Supplementary material for: Clinical Impact of a Pharmacist-Driven Prospective Audit with Intervention and Feedback on the Treatment of Patients with Bloodstream Infection
Source: MDPI journal article supplement (doi:10.3390/antibiotics11091144), 2022-08-24
Supplement: s1 [file s1]

Figure S2. Sensitivity analysis for DOT of carbapenem and tazobactam/piperacillin.

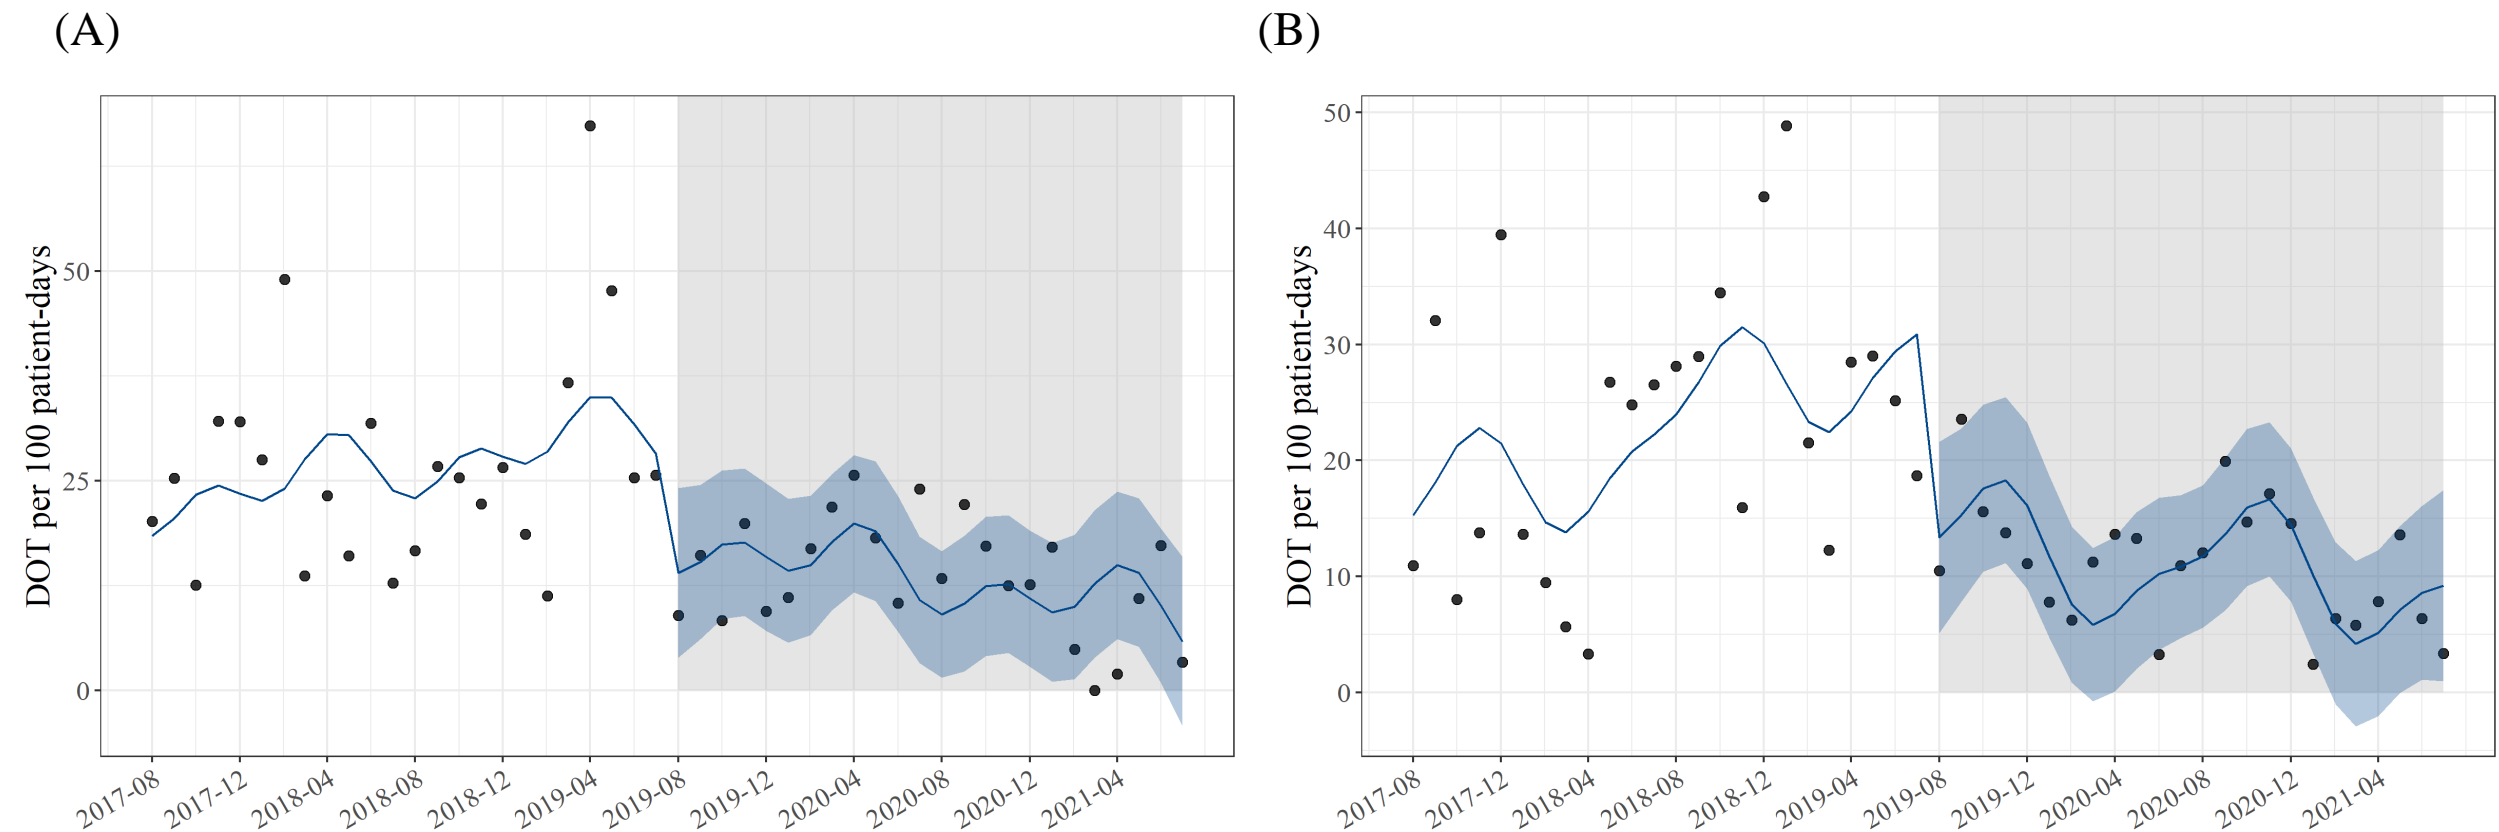

A, DOT of carbapenem; B, DOT of tazobactam/piperacillin.

The gray area indicates the start of pharmacist-driven PAF. The dots indicate the measured values for each month, and the blue line indicates the regression line.

The light blue band indicates 95% confidence interval.

Abbreviation: DOT, days of therapy; PAF, prospective audit with intervention and feedback
