# Supplementary material for: Clinical Impact of a Pharmacist-Driven Prospective Audit with Intervention and Feedback on the Treatment of Patients with Bloodstream Infection
Source: MDPI journal article supplement (doi:10.3390/antibiotics11091144), 2022-08-24
Supplement: s1 [file s1]

Figure S1. Sensitivity analysis for the proportion of de-escalation.

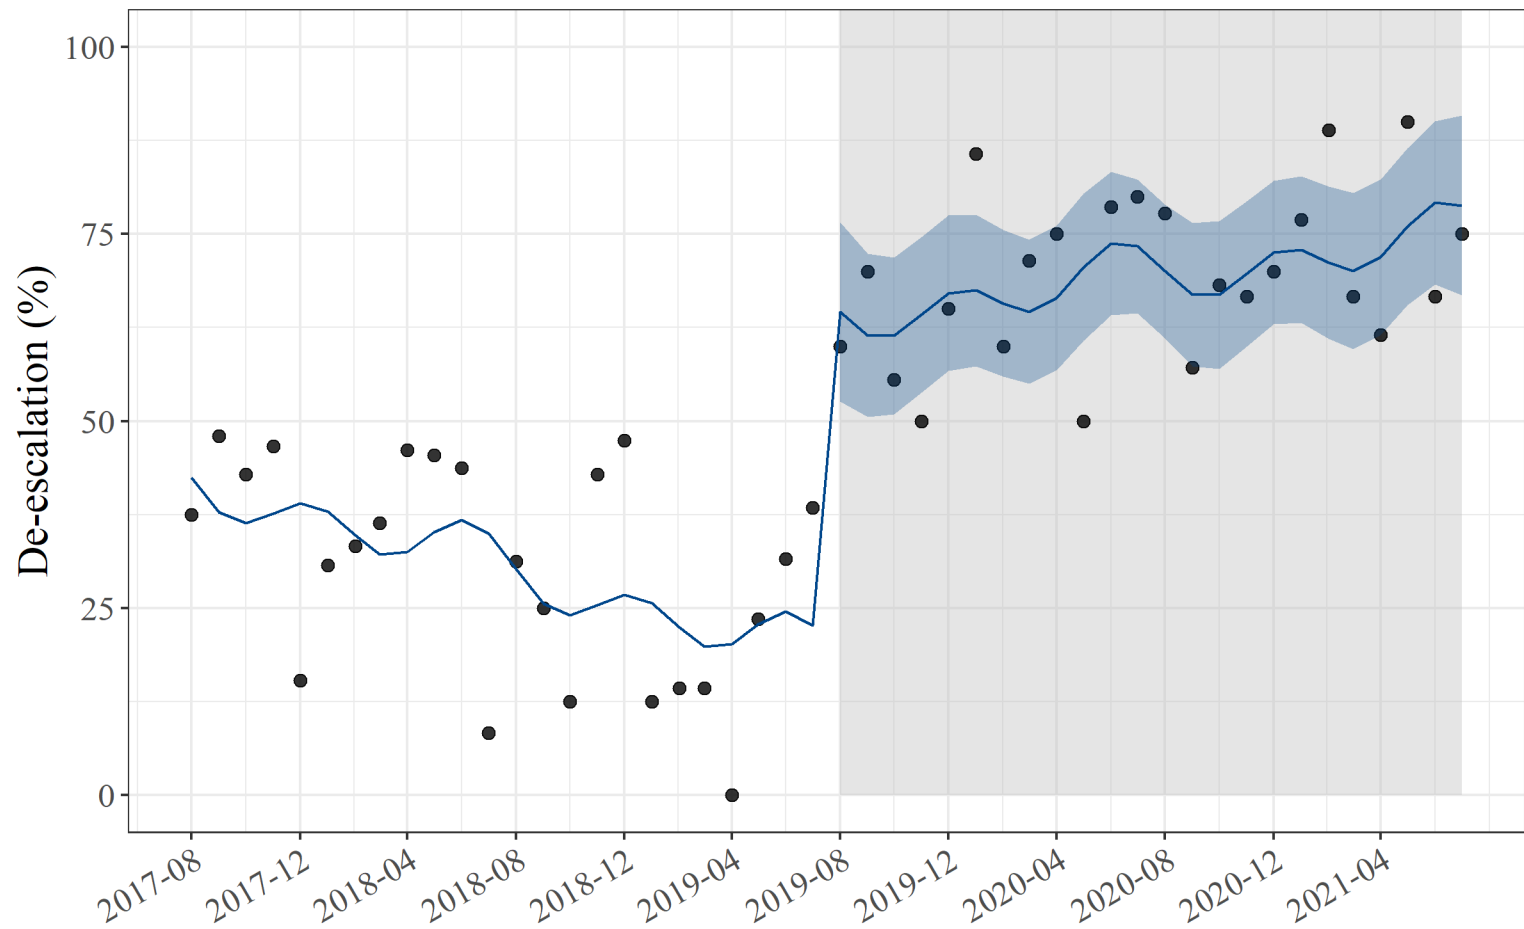

The gray area indicates the start of pharmacist-driven PAF.

The dots indicate the measured values for each month, and the blue line indicates the regression line. The light blue band indicates 95% confidence interval.

Abbreviation: PAF, prospective audit with intervention and feedback
