# Supplementary material for: Clinical Impact of a Pharmacist-Driven Prospective Audit with Intervention and Feedback on the Treatment of Patients with Bloodstream Infection
Source: MDPI journal article supplement (doi:10.3390/antibiotics11091144), 2022-08-24
Supplement: s1 [file s1]

Table S1. Parameters of sensitivity analysis.

| Parameter                       | Estimate | 95% CI      | p-value |
|---------------------------------|----------|-------------|---------|
| De-escalation                   |          |             |         |
| Level change                    | 47       | 31, 62      | <0.01   |
| Slope change                    | 1.5      | 0.44, 2.5   | <0.01   |
| DOTs of carbapenem              |          |             |         |
| Level change                    | -13      | -27, -0.03  | 0.049   |
| Slope change                    | -0.78    | -1.7, 0.10  | 0.079   |
| DOTs of tazobactam/piperacillin |          |             |         |
| Level change                    | -19      | -30, -8.5   | <0.01   |
| Slope change                    | -0.86    | -1.6, -0.14 | 0.020   |
